# Supplementary material for: Multiple rare and common variants in APOB gene locus associated with oxidatively modified low-density lipoprotein levels
Source: PubMed Central journal article supplement (PMC6544350; doi:10.1371/journal.pone.0217620), 2019-05-31
Supplement: pone.0217620.s009.pdf [file pone.0217620.s009.pdf]

| Parameter                            | r (Spearman) | <i>P</i> -value        |
|--------------------------------------|--------------|------------------------|
| Total cholesterol                    | 0.54         | $9.62 \times 10^{-56}$ |
| Triglycerides                        | 0.33         | $3.50 \times 10^{-20}$ |
| Low-density lipoprotein cholesterol  | 0.55         | $4.49 \times 10^{-59}$ |
| High-density lipoprotein cholesterol | -0.08        | 0.025                  |
| High-sensitivity C-reactive protein  | 0.14         | $2.19 \times 10^{-4}$  |
| Lipoprotein (a)                      | 0.02         | 0.533                  |
| Apolipoprotein A1                    | 0.01         | 0.709                  |
| Apolipoprotein B                     | 0.61         | $2.34 \times 10^{-68}$ |
| Total stenosis                       | 0,11         | $5.54 \times 10^{-3}$  |
| Plaque number                        | 0,11         | $6.79 \times 10^{-3}$  |
| Mean intima-medial thickness         | 0,11         | $7.02 \times 10^{-3}$  |

Table S1: Correlation of oxLDL levels with biochemical parameters and ultrasound markers of atherosclerosis.
