# Supplementary material for: Multiple rare and common variants in APOB gene locus associated with oxidatively modified low-density lipoprotein levels
Source: PubMed Central journal article supplement (PMC6544350; doi:10.1371/journal.pone.0217620), 2019-05-31
Supplement: pone.0217620.s010.pdf [file pone.0217620.s010.pdf]

| Genomic position<br>(GRCh37/hg19) | SNP ID     | MAF<br>(1000Genomes) | Annotation | SIFT/<br>PolyPhen-2 | Amino acid<br>change | <i>P</i> -value       |
|-----------------------------------|------------|----------------------|------------|---------------------|----------------------|-----------------------|
| 21198900                          | rs11902417 | 0.385383             | intergenic |                     |                      | $3.60 \times 10^{-9}$ |
| 21203877                          | rs10184054 | 0.371006             | intergenic |                     |                      | $7.08 \times 10^{-9}$ |
| 21206183                          | rs6754295  | 0.40595              | intergenic |                     |                      | $7.85 \times 10^{-9}$ |
| 21204025                          | rs6544366  | 0.371605             | intergenic |                     |                      | $8.16 \times 10^{-9}$ |
| 21205502                          | rs4564803  | 0.386182             | intergenic |                     |                      | $8.55 \times 10^{-9}$ |
| 21208211                          | rs7557067  | 0.370008             | intergenic |                     |                      | $9.54 \times 10^{-9}$ |
| 21225281                          | rs1042034  | 0.629593             | missense   | T / B               | p.Ser4338Asn         | $1.13 \times 10^{-8}$ |
| 21226560                          | rs2678379  | 0.610423             | intronic   |                     |                      | $1.14 \times 10^{-8}$ |
| 21231524                          | rs676210   | 0.366214             | missense   | D / D               | p.Pro2739Leu         | $1.14 \times 10^{-8}$ |
| 21237544                          | rs673548   | 0.385783             | intronic   |                     |                      | $1.14 \times 10^{-8}$ |
| 21193946                          | rs6728178  | 0.384984             | intergenic |                     |                      | $1.23 \times 10^{-8}$ |
| 21142994                          | rs4296389  | 0.534145             | intergenic |                     |                      | $7.29 \times 10^{-8}$ |
| 21240031                          | rs11680233 | 0.611821             | intronic   |                     |                      | $8.61 \times 10^{-8}$ |
| 21240364                          | rs11126598 | 0.613419             | intronic   |                     |                      | $2.18 \times 10^{-7}$ |

Table S2: Fourteen the most significant SNPs obtained by GWAS for oxLDL levels in 725 samples. All SNPs are localized on Chromosome 2 in *APOB* gene region.

SIFT score: T - Tolerated, D - Deleterious; PolyPhen-2 score: B - Benign, D - Probably damaging.
